# Supplementary material for: Exploring Gerotranscendence Experiences of Turkish Older People with the Guided Autobiography Method
Source: Research Square preprint supplement (doi:10.21203/rs.3.rs-7384529/v1), 2025-10-13
Supplement: Supplementary file 1 [file 8853191bda20adeb504329e2.docx]

| **APPENDIX: Stimulating questions for gerotranscendence themes** |
| --- |
| **COSMIC TRANSCENDENCE**  1. Some studies indicate that time passes faster with advancing age. In addition, we may have noticed that time passes quickly when we are with our loved ones or trying to finish a task. Conversely, when we are sad or when we move from one city to another, we may think that time is passing by quickly. Do these situations sound familiar to you?  2. Have the perspectives of people who lived in the past started to make more sense to you over time? Do you have an example of this? What kind of change occurred?  3. Has your perspective on death changed over time? This change can be positive or negative. Is there a memory that caused this change?  4. Have there been events in your life that you call miraculous? How has your perspective on miracles or fatalism developed over time?  5. Think about your relationship with nature and animals. Compared to the past, when you think about your spiritual state today, do you feel closer to nature or more distant? How did this change first occur? |
| **SELF-TRANSCENDENCE**  1. Have you noticed any characteristics about yourself over the years that you hadn't noticed before but later did? For example, you might have noticed that you have a talent for playing an instrument, that you enjoy going on outings, or that you used to be a very social person, but now you like spending time at home. If so, how did you notice it?  2. Is there a moment when you thought your existence in the world was very important but then realized that it wasn't that important and that you were just an ordinary person? Is there an experience where you felt relieved when you realized that others could do tasks that you thought only you could do?  3. When you look at your relationship with your body, how do you think it has changed? How have changes, illnesses, or disabilities that occur during the aging process affected your body and the way you perceive yourself? What feelings and thoughts did the changes in your body cause you?  4. Is there a moment when you realized that while you used to do things for yourself, the targets of your actions were now others (your spouse, grandchild, child, friend) and that you were more altruistic? How do you think your process of sacrifice and striving for others has changed?  5. If you could talk to yourself in the past, what would you say? What do you think about the decisions you have made and the actions you have taken so far? Do you believe that all of them, good and bad, have been experiences that have shaped who you are today, or do you have a more negative perspective? |
| **SOCIAL TRANSCENDENCE**  1. When you consider your friendships and social life, what kind of process do you think you are going through? Are your friendships deeper but with a limited number of people compared to the past, or are they more crowded but more superficial?  2. We all have various roles in our lives. While some roles are taken on by our own will, others are given to us by those around us and society. How do you think your perspective on your roles in life has changed?  3. There are rules we must follow and roles we must fulfill in life, and these have a significant impact on our behaviour. For example, the expressions "act your age", "don't meddle in men's business with your dough", and "act like a child" are some examples of these rules reflected in everyday expressions. Has there been a change in your perspective on the rules in society in your life? Are there moments when you started doing something you were hesitant to do out of fear of rejection?  4. Have you noticed a change in your interest in material things and belongings? Was there a time when you used to have a desire to have more expensive things in larger quantities, but later, you started to settle for less and saw that you were happy that way?  5. How do you think there has been a change between your reactions to events in the past and your reactions today? Have you ever felt more careful when making a decision and felt the need to wait and think longer than before in the process of sharing what you know and taking action? |
